# Supplementary material
Source: PubMed Central journal article supplement (PMC2528021)
Supplement: NIHMS62570-supplement-1_s.pdf [file NIHMS62570-supplement-1_s.pdf]

**Table S-1.** Mean base peak intensity of angiotensin infusion in six columns run on the RCADiA stage and the standard axial stage.

| Column name           | 1        | 2        | 3        | 4        | 5        | 6        |
|-----------------------|----------|----------|----------|----------|----------|----------|
| Angle of Electropray  | -32.1    | -19.3    | -6.4     | 6.4      | 19.3     | 32.1     |
| RCADiA-1              | 1.56E+08 | 1.61E+08 | 1.88E+08 | 1.58E+08 | 1.05E+08 | 1.08E+08 |
| RCADiA-2              | 1.26E+08 | 1.64E+08 | 1.69E+08 | 1.51E+08 | 1.36E+08 | 1.10E+08 |
| RCADiA-3              | 1.39E+08 | 1.74E+08 | 1.38E+08 | 1.56E+08 | 1.19E+08 | 1.06E+08 |
| RCADiA-4              | 1.53E+08 | 1.74E+08 | 1.45E+08 | 1.47E+08 | 9.32E+07 | 1.24E+08 |
| RCADiA-mean           | 1.44E+08 | 1.68E+08 | 1.60E+08 | 1.53E+08 | 1.13E+08 | 1.12E+08 |
| RCADiA-standard error | 1.21E+07 | 5.66E+06 | 1.97E+07 | 4.26E+06 | 1.59E+07 | 7.10E+06 |
| Angle of Electropray  | 0.00     | 0.00     | 0.00     | 0.00     | 0.00     | 0.00     |
| axial-1               | 1.54E+08 | 1.60E+08 | 1.15E+08 | 1.85E+08 | 1.34E+08 | 1.78E+08 |
| axial-2               | 1.50E+08 | 1.67E+08 | 1.22E+08 | 1.91E+08 | 1.31E+08 | 1.87E+08 |
| axial-3               | 1.47E+08 | 1.64E+08 | 1.24E+08 | 1.94E+08 | 1.32E+08 | 1.66E+08 |
| axial-4               | 1.46E+08 | 1.46E+08 | 1.37E+08 | 1.90E+08 | 1.38E+08 | 1.57E+08 |
| axial-mean            | 1.49E+08 | 1.59E+08 | 1.25E+08 | 1.90E+08 | 1.34E+08 | 1.72E+08 |
| axial-standard error  | 2.96E+06 | 8.20E+06 | 7.77E+06 | 3.13E+06 | 2.43E+06 | 1.16E+07 |
